1 **Post-mitotic Prox1 expression controls the final specification of**  
2 **cortical VIP interneuron subtypes**

3 Tevye Jason Stachniak<sup>1,2\*</sup>, Rahel Kastli<sup>1,2\*</sup>, Olivia Hanley<sup>1,2</sup>, Ali Özgür Argunsah<sup>1,2</sup>, Theofanis  
4 Karayannis<sup>1,2+</sup>

5 <sup>1</sup>Laboratory of Neural Circuit Assembly, Brain Research Institute, University of Zurich  
6 Winterthurerstrasse 190, CH-8057 Zurich, Switzerland

7 <sup>2</sup>Neuroscience Center Zurich, University of Zurich and ETH Zurich, Winterthurerstrasse 190,  
8 CH-8057 Zurich, Switzerland

9 \*these authors contributed equally to this work

10 +address correspondence to [karayannis@hifo.uzh.ch](mailto:karayannis@hifo.uzh.ch)

11 **Number of Figures: 4**

12 **Number of Supplementary Figures: 4**

## 13 **Summary**

14 Neuronal identity is controlled in multiple developmental steps by key transcription factors that  
15 determine the unique properties of a cell. During embryogenesis, the transcription factor Prox1  
16 has been shown to regulate VIP interneuron migration, survival, and as a result, circuit  
17 integration. Here, we explore the role of Prox1 as a regulator of genetic programs that guide the  
18 final specification of VIP interneuron subtypes in early post-natal life. Using in-vitro  
19 electrophysiology we find that post-natal removal of Prox1 differentially affects the synaptic  
20 integration of VIP bipolar and multipolar subtypes.

21 RNA sequencing reveals that one of the downstream targets of Prox1 is the postsynaptic  
22 protein Efn1, a constitutive regulator of presynaptic release probability. Genetic,  
23 pharmacological and electrophysiological experiments demonstrate that knocking out Prox1  
24 reduces Efn1 function in VIP multipolar but not in bipolar cells. Thus, in addition to the activity-  
25 dependent and contextual processes that finalize developmental trajectories, genetic programs  
26 engaged by Prox1 control the differentiation and connectivity of VIP interneuron subtypes.

## 27 **Introduction**

28 Although cortical interneuron (IN) diversity begins at their place of birth within distinct embryonic  
29 progenitor domains (Mi et al., 2018), single cell sequencing and manipulation experiments at  
30 different developmental stages have suggested that INs undergo their final specification while  
31 integrating into the developing circuit (De Marco García et al., 2011; Mayer et al., 2018). The  
32 developmental mechanisms by which distinct types of INs acquire their mature characteristics  
33 are only beginning to be revealed (Favuzzi et al., 2019). Interestingly, post-mitotic manipulations  
34 have demonstrated a persistent requirement for key transcription factors (TF) in the final  
35 specification and maintenance of pyramidal cell fate (De La Rossa et al., 2013). Whether similar  
36 TF mechanisms exist for cortical INs remains unknown.

37

38 Cortical vasoactive intestinal peptide-expressing (VIP) INs are a diverse population (Tasic et al.,  
39 2018). Even though they make up less than 5% of all neurons, VIP INs are critically important  
40 for cortical circuit maturation and their malfunction has been implicated in neurodevelopmental  
41 disorders (Batista-Brito et al., 2017; Mossner et al., 2020). The TF Prospero-related homeobox1  
42 (Prox1) is expressed by the majority of INs derived from the caudal ganglionic eminence (CGE).  
43 Its removal during embryonic development impairs VIP cell migration, cell survival, as well as  
44 dendritic development and afferent connectivity of the Calretinin-expressing (CR+) VIP bipolar  
45 subtype (Miyoshi et al., 2015). Importantly, Prox1 remains expressed in all VIP INs as they  
46 integrate into the developing circuit, suggesting it may have a role in organizing not only their  
47 early stages of development, but also their final specification. In addition to requiring Prox1, it  
48 has been shown that CR+ VIP bipolar cells also require proper network activity to acquire their  
49 characteristic axo-dendritic profile, as do Reelin- and Somatostatin (SST)- expressing INs (De  
50 Marco García et al., 2011, 2015; Pan et al., 2018). Although Prox1 is also expressed in the  
51 cholecystokinin-expressing (CCK+) VIP multipolar subtype, these cells do not show any  
52 positional or morphological deficits following activity manipulations (De Marco García et al.,

53 2011). Taken together, these findings raise the possibility that during the final developmental  
54 steps of VIP IN specification, cell-autonomous and activity-dependent genetic programs work in  
55 tandem to guide the network integration of distinct VIP subtypes in a differential manner.

56  
57 In this study, we assess the post-natal requirement of Prox1 for the final diversification of VIP IN  
58 subtypes. To achieve this, we conditionally remove this TF during the first post-natal week,  
59 using a *VIPCre* driver mouse line, and explore the synaptic integration of bipolar and multipolar  
60 VIP cells using functional and RNA screening methods. Surprisingly, we find that Prox1 removal  
61 impacts the two subtypes differentially. Consistent with previous findings, bipolar cells have  
62 reduced synaptic excitation upon removal of Prox1. In contrast, multipolar cells show instead an  
63 alteration in the short-term synaptic dynamics of their incoming excitation. Using transcriptomic  
64 screening and pharmacological manipulations we demonstrate that a Prox1-dependent  
65 engagement of the trans-synaptic protein Eln1 selectively enables the synaptic facilitation  
66 observed in multipolar cells.

## 67 **Results**

### 68 **1) Postnatal Prox1 removal leads to changes in presynaptic release probability onto VIP** 69 **multipolar but not bipolar cells**

70 Cell-specific synaptic wiring properties are a prominent feature of IN cell type diversity. Previous  
71 research found that embryonic Prox1 removal leads to aberrant network integration of VIP  
72 bipolar cells (Miyoshi et al., 2015) while the effect on multipolar cells is unknown. Therefore, we  
73 first wanted to test whether postnatal loss of function of Prox1 (KO) affects the network  
74 integration of bipolar, as well as multipolar VIP cells. To postnatally (~P3) remove Prox1, we  
75 used a VIP knock-in mouse line that drives the expression of Cre from the endogenous peptide  
76 locus (*VIPCre*), combined with a conditional *Prox1* allele. The *Prox1* coding region is flanked by  
77 *loxP* sites and recombination shifts *eGFP* into frame (*Prox1eGFP*) to label all Prox1+ VIP cells  
78 (Figure 1A). We first surveyed spontaneous excitatory postsynaptic currents (sEPSCs) in L2/3

79 control (*Prox1* heterozygote; GFP labeled) and *Prox1* KO VIP INs in acute brain slices for  
80 alterations which would indicate connectivity changes. Indeed, we found that postnatal  
81 expression of *Prox1* regulates incoming excitatory inputs onto both VIP subtypes, albeit with  
82 subtype specific differences in time course and valence (Supplementary Figure 1).

83 To reveal the mechanism by which *Prox1* regulates the strength of excitatory inputs onto the  
84 two VIP subtypes we further examined the short-term dynamics of evoked synaptic responses  
85 onto control and *Prox1* KO cells at P17-21 (Figure 1B). Changes in the paired pulse ratio (PPR)  
86 of the 2<sup>nd</sup> to 1<sup>st</sup> evoked EPSC amplitude implicate a presynaptic versus postsynaptic change,  
87 and provide an indication of whether presynaptic release probability for a given synapse is low  
88 (PPR > 1), moderate (PPR ~ 1), or high (PPR < 1). Two electrical stimuli were delivered at 50  
89 Hz through a glass pipette placed close to the soma and proximal dendrites of the recorded  
90 cells. We found that glutamatergic synapses onto control VIP bipolar cells show negligible  
91 synaptic facilitation (mean PPR:  $1.15 \pm 0.13$ ) and that *Prox1* KO does not affect the PPR  
92 significantly (mean PPR  $0.93 \pm 0.15$ ) (Figure 1C, D). On the other hand, excitatory inputs onto  
93 VIP multipolar cells show more pronounced facilitation in the control condition (mean PPR:  $1.51$   
94  $\pm 0.11$ ) and a notable reduction of the PPR upon removal of *Prox1* (mean PPR:  $1.13 \pm 0.1$ )  
95 (Figure 1E, F). These results demonstrate that in control conditions the initial release probability  
96 of glutamatergic synapses onto VIP multipolar cells is lower than onto bipolar cells, in line with  
97 previous reports showing that L2/3 CR+ bipolar cells display short-term synaptic depression at  
98 10Hz and no change at 50Hz (Caputi et al., 2009) ([https://portal.brain-](https://portal.brain-map.org/explore/connectivity/synaptic-physiology)  
99 [map.org/explore/connectivity/synaptic-physiology](https://portal.brain-map.org/explore/connectivity/synaptic-physiology)). Importantly, the data also shows that  
100 postnatal removal of *Prox1* leads to an increase in initial release probability of excitatory  
101 synapses onto multipolar, but not bipolar cells.

## 102 **2) Loss of *Prox1* leads to a downregulation of the trans-synaptic protein Elnf1**

103 Having identified a Prox1-dependent suppression of synaptic release probability onto multipolar  
104 cells, we hypothesized that this may occur through the regulation of genes encoding for synaptic  
105 proteins. To identify such potential downstream targets of Prox1 we performed a RNA  
106 sequencing screen on control and Prox1 KO cells, after fluorescence activated cell sorting  
107 (FACS) of the GFP+ VIP cells at P8 and P12 (Figure 2A). Differential gene expression analysis  
108 of the data identified several potential candidate genes (Figure 2B, C) (Supplementary Figure  
109 2C, D), which were analysed for gene ontology (GO) enrichment. The GO analysis revealed that  
110 most of the upregulated genes in Prox1 KO cells are associated with glial cell programs (Figure  
111 2D). This result suggests that in control VIP cells, post-natal expression of Prox1 suppresses  
112 those glial programs, directing the cell instead towards a neuronal fate. In line with this, as well  
113 as with our functional findings, the most enriched downregulated genes are associated with  
114 synapses and synapse-associated signalling (Figure 2D, E). Within those synapse-associated  
115 programs we specifically looked for genes that could mediate trans-synaptic interactions  
116 between the postsynaptic VIP and the presynaptic excitatory cell to regulate synaptic release.  
117 One such gene was the Extracellular Leucine Rich Repeat and Fibronectin Type III Domain  
118 Containing 1 (*Elfn1*) (Figure 2C), which creates the strongly facilitating excitatory synaptic inputs  
119 of SST INs (Sylwestrak and Ghosh, 2012). Postsynaptic *Elfn1* produces cell-autonomous  
120 suppression of presynaptic glutamate release through its trans-synaptic recruitment of  
121 metabotropic-glutamate receptor 7 (mGluR7) (Stachniak et al., 2019; Tomioka et al., 2014).

122 The RNA sequencing data showed that the level of *Elfn1* mRNA in VIP cells is high at both P8  
123 and P12 (Supplementary Figure 3A). To assess if *Elfn1* is continuously expressed into  
124 adulthood, we consulted published single-cell RNA sequencing data (Tasic et al., 2018) and  
125 found that, in the adult cortex, almost all VIP cells express *Elfn1* (Supplementary Figure 3B).  
126 Furthermore, this dataset also shows a persistent expression of *Prox1*, which suggests a  
127 continued requirement for these two factors in the maintenance of cell function throughout life.

128 **3) Reduction in *Elfn1* expression recapitulates the *Prox1* KO phenotype in VIP multipolar**  
129 **cells**

130 To test if *Elfn1* is the downstream molecule responsible for the synaptic phenotype in *Prox1* KO  
131 multipolar VIP cells we used a compound mouse line that labeled VIP neurons (*VIPCre* x  
132 *tdtomato* reporter; *Ai14*) in the background of a germline *Elfn1* KO allele (*Elfn1KO*) (Figure 3A).  
133 We chose to compare VIP *tdtomato*<sup>+</sup> cells from heterozygous *Elfn1KO* (Het *Elfn1*) animals to  
134 those from wildtype (control) littermates, to match our findings in the RNA sequencing screen,  
135 which showed a two-fold reduction of *Elfn1* in *Prox1* KO cortex (Figure 2C). We found that  
136 reducing *Elfn1* expression does not affect the PPR significantly in VIP bipolar cells (control  
137 mean PPR:  $1.15 \pm 0.14$ ; Het *Elfn1* mean PPR  $0.98 \pm 0.08$ ) (Figure 3B, C). On the other hand,  
138 excitatory inputs onto VIP multipolar cells showed a notable reduction in the PPR when *Elfn1*  
139 levels are reduced (control mean PPR:  $1.30 \pm 0.13$ ; Het *Elfn1* mean PPR:  $0.88 \pm 0.08$ ) (Figure  
140 3D, E). Our results show that a decrease in *Elfn1* expression recapitulates the effect of  
141 knocking-out *Prox1* in VIP multipolar cells but has no notable effect in bipolar cells. This finding  
142 suggests that *Prox1* is important for initiating and/or maintaining the expression of *Elfn1* in  
143 multipolar cells, which leads to facilitation of incoming excitatory synaptic responses.

144 **4) *Prox1*-dependent engagement of *Elfn1* in VIP cells**

145 To directly test the relationship between *Prox1* and the expression of *Elfn1* in multipolar and  
146 bipolar cells, we turned to a pharmacological agent, (RS)- $\alpha$ -Methylserine-O-phosphate (MSOP),  
147 that acts as an antagonist for presynaptic mGluRs (including mGluR7), which are reported to  
148 interact trans-synaptically with *Elfn1* (Figure 3F) (Dunn et al., 2018). Application of MSOP  
149 indirectly tests for the presence of *Elfn1* in control and *Prox1* KO VIP cells by blocking the  
150 constitutive suppression of synaptic release that *Elfn1* induces through mGluRs (Stachniak et  
151 al., 2019). We therefore evoked excitatory synaptic events onto the two VIP subtypes, as

152 described above, and assessed changes in neurotransmitter release in response to MSOP. We  
153 found that MSOP did not affect the release probability onto control (PPR:  $1.11 \pm 0.18$  at  
154 baseline vs.  $1.04 \pm 0.14$  in MSOP) or Prox1 KO VIP bipolar cells (PPR:  $0.95 \pm 0.29$  at baseline  
155 vs.  $0.88 \pm 0.24$  in MSOP) (Figure 3G, H). In contrast, MSOP markedly increased the initial  
156 release probability of excitatory inputs onto control VIP multipolar cells and thus reduced the  
157 paired pulse ratio (PPR:  $1.43 \pm 0.14$  at baseline vs.  $1.11 \pm 0.09$  in MSOP) (Figure 3I). However,  
158 the effect of MSOP was absent in the Prox1 KO VIP multipolar cells (PPR:  $1.37 \pm 0.19$  at  
159 baseline vs.  $1.23 \pm 0.21$  in MSOP) (Figure 3J).

160 In previous studies, both VIP bipolar and multipolar cells were shown to express *Elfn1* in the  
161 adult cortex (Paul et al., 2017; Tasic et al., 2018). This mRNA data stands in apparent  
162 contradiction to the VIP multipolar cell-selective effects of *Elfn1* we observe in our Prox1 loss-of-  
163 function, *Elfn1* downregulation, and pharmacological experiments. We therefore hypothesized  
164 that either only multipolar cells express *Elfn1* before P21, or that Prox1 selectively regulates  
165 *Elfn1* expression in multipolar cells. To test these two possibilities, we collected and sectioned  
166 brains from Prox1 conditional postnatal KO mice, (*Prox1fl* x *VIPCre* x *Ai14*) at P12 and  
167 performed *in situ* hybridization for *Elfn1* mRNA and *CR* mRNA to distinguish putative bipolar  
168 (*CR*+) and multipolar (*CR*-) VIP cells (Figure 4A, B). We then obtained images of whole cortices  
169 and analyzed them using a custom-written MATLAB script (see Methods). We first assessed the  
170 presence of *Elfn1* mRNA in control VIP cells at P12, which showed that, similarly to the adult  
171 cortex (Paul et al., 2017; Tasic et al., 2018), *CR*+ VIP cells express the gene at a higher level  
172 than *CR*- VIP cells (Figure 4C, Supplementary Figure 4C). This finding negates the first  
173 hypothesis regarding age-dependent selective expression of *Elfn1* in multipolar cells.

174 We subsequently compared *Elfn1* and *CR* expression between control and KO tissue and found  
175 a clear reduction of both signals (Figure 4D, E), which is in line with the RNAseq results that  
176 showed a downregulation of both genes (log<sub>2</sub> ratio of -1.466 for *CR* and -1.065 for *Elfn1*).



177 Intriguingly, this reduction was seen for both *CR*<sup>+</sup> (bipolar) VIP cells and *CR*<sup>-</sup> VIP ones (many of  
178 which belong to the multipolar subtype) (Figure 4F, G, Supplementary Figure 4D, E). These  
179 results suggest that Prox1 regulates *Elfn1* in both subtypes of VIP cells. Hence our second  
180 hypothesis is also negated, leaving open other possible mechanisms that are discussed below.

## 181 **Discussion**

182 In the mammalian nervous system the TF Prox1 is known to regulate cell-cycle exit (Cid et al.,  
183 2010; Kaltezioti et al., 2010) and cell fate determination (Iwano et al., 2012; Kaltezioti et al.,  
184 2014) of neural precursor cells. Post-mitotic removal of Prox1 in embryonic CGE-derived  
185 cortical INs results in a failure of *CR*<sup>+</sup> VIP INs to migrate to the correct cortical layers, a  
186 dramatic decrease in their numbers, and a subsequent reduction in the excitatory synaptic input  
187 onto the remaining cells (Miyoshi et al., 2015). Postnatal removal of Prox1 circumvents cell  
188 death and layer mis-targeting. Nevertheless, we find a continued requirement for the TF in the  
189 regulation of the proper synaptic integration and final specification of VIP subtypes. Our results  
190 demonstrate that post-natal expression of Prox1 is necessary for maintenance of expression  
191 levels of the bipolar cell marker *CR*, and for both VIP bipolar and multipolar cells to connect  
192 properly to their cortical networks. Furthermore, we show that Prox1 is necessary for synaptic  
193 facilitation of excitatory inputs onto VIP multipolar cells and that it exerts this function by  
194 regulating *Elfn1* expression. An emerging theme from single cell transcriptomics studies is that  
195 cell adhesion molecules like *Elfn1* may determine the cell specific interactions that guide  
196 connectivity profiles of IN subtypes (Paul et al., 2017). Accordingly, by regulating VIP subtype  
197 specific *Elfn1* engagement, the TF Prox1 promotes and maintains functional diversity for VIP IN  
198 subtypes.

199 The selective engagement of *Elfn1* in VIP multipolar cells leads to excitatory synaptic facilitation  
200 through a reduction in the initial release probability. In SST INs this *Elfn1*-dependent facilitation

201 of excitatory inputs prevents rapid recruitment, thereby creating the characteristic “delayed”  
202 firing of these INs (Sylwestrak and Ghosh, 2012) and biasing responsiveness towards high  
203 frequency activity (Pouille and Scanziani, 2004; Stachniak et al., 2019). The same mechanism  
204 would allow VIP multipolar cells to selectively tune to the high frequency activity characteristic of  
205 cortico-cortical communication (Palmer et al., 2012). Thus, by regulating *Elfn1*, *Prox1* may prime  
206 these neurons to coordinate intra-cortical communication within the superficial layers of the  
207 cortex. Interestingly, the SST INs do not express *Prox1*, therefore our results not only identify a  
208 novel functional role for *Elfn1* in VIP multipolar INs, but also reveal a novel regulatory pathway  
209 for *Elfn1* expression.

210 In contrast, short-term plasticity of excitatory inputs onto bipolar cells is unaffected by removal of  
211 *Prox1*, by decreased *Elfn1* expression, or by the pharmacological blockade of its synaptic  
212 effects. These findings are surprising given that our results and published data show high levels  
213 of *Elfn1* mRNA expression in bipolar VIP cells. Thus, it appears that in this VIP subtype, *Elfn1*  
214 mRNA levels are uncoupled from *Elfn1* function. An explanation for this discrepancy between  
215 expression and function could be that the presynaptic excitatory terminals onto bipolar cells lack  
216 mGluR7, despite the presence of *Elfn1* protein. This could arise if distinct cell populations target  
217 VIP bipolar and multipolar cells, which, for example, may receive different amounts of thalamo-  
218 cortical and cortico-cortical inputs. The two subtypes tend to sit in different parts of L2/3, with  
219 VIP multipolar cells often found close to the border to L1, while VIP bipolar cells usually are  
220 located closer to L4 (He et al., 2016). In combination with their distinct dendritic architecture, this  
221 could determine the origin of inputs the VIP subtypes receive (Sohn et al., 2016). Additionally,  
222 the distinct glutamate receptor composition expressed by the two VIP subtypes (Paul et al.,  
223 2017) could also point to cell selective synaptic wiring. Alternatively, the cell type specificity we  
224 observe could be a combination of *Prox1*-dependent and independent mechanisms that would  
225 regulate subtype specific protein expression, such as differential microRNA expression or

226 alternative splicing. Indeed, *Efn1* can be regulated by microRNAs, and showed a 75% increase  
227 in expression following deletion of the *mirg* microRNA cluster in an induced neuronal culture  
228 system (Whipple et al., 2020).

229 Even though we find that Prox1 does not affect release probability onto bipolar cells, it clearly  
230 plays a role in the cells' synaptic integration into the circuit. Previous work demonstrated a  
231 critical role for electrical activity in the final specification of VIP bipolar cells (De Marco García et  
232 al., 2011). This finding may well relate to the differential expression of excitatory synaptic  
233 components such as the subunits of NMDA receptors. Published research has shown that adult  
234 cortical bipolar VIP cells have high expression of the NR2B subunit (Paul et al., 2017). This  
235 finding is intriguing given that the receptors containing this subunit are critical for the integration  
236 of superficial Reelin-positive INs, via their activation by thalamocortical terminals (De Marco  
237 García et al., 2015). Although we find no evidence for direct regulation of NR2B expression by  
238 Prox1, the regulation of cofactors that control thalamocortical excitation through NR2B-  
239 containing receptors could underlie the observed Prox1 KO phenotype in bipolar cells.

240 The final specification of neurons is a process that takes place after the cells' birth, as they start  
241 integrating into the resident circuit. It is during this time of establishing connections that the  
242 needs of the circuit, as defined by those of the animal, can instruct a neuron towards its mature  
243 state, which includes the proper construction and function of inputs and outputs. In inhibitory INs  
244 these input/output specificities vary considerably, not only between cardinal IN classes, but also  
245 between the subtypes within a class (Huang and Paul, 2019). Our data provides evidence that  
246 the continuous expression of the TF Prox1 is necessary for the final specification of bipolar and  
247 multipolar VIP cells, allowing them to acquire diverging roles within the adult cortical network.

## 248 **Material and Methods**

### 249 **Mice**

250 All animal experiments were approved by the Cantonal Veterinary Office Zurich and followed  
251 Swiss national regulations. Animal lines used in this study are: *VIPCre* ( $Vip^{tm1(cre)Zjh/J}$ ) (Taniguchi  
252 et al., 2011), *Ai14* (B6;129S6-Gt(ROSA)<sup>26Sortm14(CAG-tdTomato)Hze/J</sup>) (Madisen et al., 2010), *Prox1fl*  
253 ( $Prox1^{tm2Gco}$ ) (Harvey et al., 2005), *Prox1eGFP* ( $Prox1^{tm1.1Fuma}$ ) (Iwano et al., 2012) and *Elfn1KO*  
254 ( $Elfn1^{tm1(KOMP)Vlcg}$ ) (created by the Knock Out Mouse Project). The following compound lines  
255 were created for this study: *VIPCre x Prox1eGFP* and *VIPCre x Ai14 x Elfn1KO* for  
256 electrophysiology experiments, *VIPCre x Ai14 x Prox1fl* for *in situ* experiments. All crosses were  
257 setup to produce both KO and Control animals in the same litter and littermate controls were  
258 used throughout the study.

### 259 **Electrophysiology**

260 Whole-cell patch-clamp electrophysiological recordings were performed on GFP labelled VIP  
261 neurons located in neocortical layers II–III of barrel cortex (approximately bregma -0.5 to -2.0  
262 mm) in acute brain slices prepared from P17–P22 male and female mice. Briefly, animals were  
263 decapitated and the brain was dissected out and transferred to cold cutting solution containing  
264 (in mM): 75 sucrose, 87 NaCl, 25 NaHCO<sub>3</sub>, 25 D-glucose, 2.5 KCl, 7 MgCl<sub>2</sub>, and 1.25 NaH<sub>2</sub>PO<sub>4</sub>,  
265 aerated with 95% O<sub>2</sub> / 5% CO<sub>2</sub>. 300 μm slices were recovered in artificial cerebrospinal fluid  
266 (ACSF) composed of (in mM): 128 NaCl, 3 KCl, 26 NaHCO<sub>3</sub>, 1.25 NaH<sub>2</sub>PO<sub>4</sub>, 1 MgCl<sub>2</sub>, 2 CaCl<sub>2</sub>,  
267 and 10 glucose at 34°C for 15 min. Acute slices were perfused at a rate of 2–3 ml/min with  
268 oxygenated recording ACSF at room temperature. Patch electrodes were made from  
269 borosilicate glass (Harvard Apparatus) and had a resistance of 2-4 MΩ. The intracellular  
270 solution contained (in mM): 126 cesium methanesulfonate, 4 CsCl, 10 HEPES, 20  
271 phosphocreatine, 4 MgATP, 0.3 NaGTP, pH 7.3, 290 mOsm, with addition of 2.5 mg/mL of  
272 biocytin.

273 Experiments were performed in voltage-clamp mode using the Axopatch 200B amplifier  
274 (Molecular Devices). sEPSCs were recorded at a holding potential ( $V_h$ ) = -65 mV, with a  
275 sampling rate of 10 kHz and were filtered on-line at 2 kHz. Access resistance was monitored to  
276 ensure the stability of recording conditions. Recordings with access resistance >40 M $\Omega$ , whole  
277 cell capacitance <4 pF or holding current >200 pA were excluded. No compensation was made  
278 for access resistance and no correction was made for the junction potential between the pipette  
279 and the ACSF. Following a baseline stabilization period (3 min), synaptic currents recorded in  
280 2x 3 min traces were low pass filtered at 400 Hz, then analyzed using clampfit event detection  
281 template match. Evoked synaptic responses were recorded at  $V_h$  = -70 mV. Electrical  
282 stimulation from a Digitimer isolated stimulator (DS2A Mk.II) was through a monopolar glass  
283 pipette (2-4 M $\Omega$ ) positioned in L2/3. The stimulating electrode was placed typically 50 - 150  $\mu$ m  
284 from the recorded cell, parallel to the pial surface. Stimulation intensity and duration were  
285 adjusted to produce stable evoked EPSC amplitudes. Stimulation intensities were larger for  
286 bipolar cells ( $86 \pm 1V$  for  $103 \pm 6 \mu$ s) than for multipolar cells ( $74 \pm 2V$  for  $86 \pm 6 \mu$ s,  $p = 3 \times 10^{-6}$ ,  
287  $p = 0.06$ ), but did not differ between genotypes (multipolar prox1 control:  $69 \pm 3V$  for  $57 \pm 5 \mu$ s,  
288 KO:  $71 \pm 4V$  for  $74 \pm 10 \mu$ s,  $p = 0.6$ ,  $p = 0.2$ ; bipolar prox1 control:  $85 \pm 2V$  for  $91 \pm 9 \mu$ s, KO:  $84 \pm$   
289  $3V$  for  $88 \pm 15 \mu$ s,  $p = 0.9$ ,  $p = 0.9$ ; multipolar Eln1 control:  $77 \pm 3V$  for  $114 \pm 13 \mu$ s, Het:  $82 \pm 3V$   
290 for  $125 \pm 19 \mu$ s,  $p = 0.2$ ,  $p = 0.6$ ; bipolar Eln1 control:  $86 \pm 3V$  for  $113 \pm 13 \mu$ s, Het:  $89 \pm 2V$  for  
291  $130 \pm 15 \mu$ s,  $p = 0.3$ ,  $p = 0.4$ , t test). Paired pulse ratios (PPR) were calculated from an average  
292 of 12 sweeps, after a 2-minute stable baseline was established. Bath applied compound MSOP  
293 (100  $\mu$ M, pH 7.4) was dissolved in water.

#### 294 **Electrophysiology data analysis**

295 Values are represented as mean  $\pm$  SEM. Number of measurements n/N indicates cells recorded  
296 (n) from animals (N), typically using 1 cell per slice to recover biocytin-stained cell morphology.  
297 Cell type was classified as bipolar vs. multipolar based on cell body morphology and number of

298 dendritic processes emanating from it, using both initial determination prior to patching and  
299 post-hoc verification of recovered biocytin-labelled cells. Matched recordings were performed  
300 with Prox1 control and Prox1 KO littermates on the same day, whenever possible. Statistical  
301 testing was done in Matlab. Comparisons within conditions were made by two-tailed paired  
302 Student's t-test, treatment versus baseline. Comparisons across conditions or between  
303 genotypes were done with an unpaired t-test assuming unequal variance. To accommodate  
304 skewed distributions in spontaneous synaptic frequency and amplitude, we performed  
305 Kolmogorov-Smirnoff non-parametric testing on event distributions and Wilcoxon non-  
306 parametric testing on averages (mean frequency, median amplitude). For multiple comparisons,  
307 a one-way or two-way ANOVA was done with a Bonferroni post hoc test. Statistical outcomes  
308 are represented in figures as: n.s.  $p > 0.05$ , \* $p < 0.05$ , \*\* $p < 0.01$ , \*\*\* $p < 0.001$ .

### 309 **Cell sorting and RNA sequencing**

310 EGFP-labeled cells were purified from the P8 and P12 cortices of control heterozygous and  
311 Prox1 KO animals (*VIPCre x Prox1eGFP/+* and *VIPCre x Prox1eGFP/eGFP*) as described  
312 (Hempel et al., 2007). Briefly, animals were anesthetized in 2% vol/vol isoflurane (~1.5min),  
313 decapitated, the brain was extracted, the olfactory bulb and cerebellum were removed, and the  
314 brain was cut into 400-um thick coronal sections using a vibratome (Leica VT1000S; Leica,  
315 speed 5, vibration frequency 7-8), while in bubbling ice cold ACSF (recipe as above, with 1mM  
316 CaCl<sub>2</sub> and 1mM MgCl<sub>2</sub>) in the chamber. Sections were collected and transferred into a  
317 protease digestion solution of ACSF (with Pronase (1mg ml<sup>-1</sup>), for 25 minutes and then  
318 transferred into a quenching solution of ACSF (with 1%FBS). Microdissection of the cortex to  
319 include the somatosensory areas was performed using a fluorescent dissection microscope  
320 (Olympus, MVX 10). Dissected cortices were collected in a 15mL falcon tube containing 1.5mL  
321 of ACSF sorting solution containing 1%FBS and DNase and cells were dissociated by gently  
322 triturating ten times with a large, then medium, and finally small fire-polished Pasteur pipette

323 while avoiding the generation of bubbles. The cell suspension was then passed through a 50uM  
324 filter (Sysmex CellTrics) before automated fluorescence-activated cell sorting (FACS) using the  
325 MoFlo™ or FACSAria™ devices. A GFP negative littermate control cortex was also included as  
326 a negative control for the FACS setup. Cells were collected into Arcturus Picopure extraction  
327 buffer and immediately processed for RNA isolation using the Arcturus PicoPure Isolation Kit  
328 (KIT0204). RNA quality and quantity was measured using Agilent High Sensitivity RNA  
329 ScreenTape system (High Sensitivity RNA Screen Tape 5067-5579-5580-5581). All samples  
330 had high quality scores between 6-8 RIN. 4-5 RNA samples of each genotype for each of the  
331 two age groups (P8 and P12) were used to prepare 19 barcoded libraries.

332 The libraries were prepared using the Smart-seq2 protocol (Picelli et al., 2013). Briefly, total  
333 RNA was placed in 4 µl of lysis buffer (0.1% vol/vol Triton X-100, 2.5 mM dNTPs, 2.5 µM oligo-  
334 dT, 1 U/µl Promega RNasin Plus RNase inhibitor). Reverse transcription was performed  
335 followed by cDNA amplification. The quality of the cDNAs was evaluated using an Agilent 2100  
336 Bioanalyzer. The resulting cDNA (1 ng) was fragmented using Illumina Nextera XT according to  
337 standard protocol. Nextera adapters containing Unique Dual Indices (UDI) were added by PCR.  
338 The libraries were double-sided size, selected and quantified using an Agilent 4200 TapeStation  
339 System.

340 TruSeq SR Cluster Kit HS4000 (Illumina, Inc, California, USA) was used for cluster generation  
341 using 10 pM of pooled normalized libraries on the cBOT. Sequencing was performed on the  
342 Illumina HiSeq 4000 single end 100 bp, using the TruSeq SBS Kit HS4000 (Illumina, Inc,  
343 California, USA).

#### 344 **RNA sequencing data analysis**

345 The raw reads were first cleaned by removing adapter sequences, trimming low quality ends,  
346 and filtering reads with low quality (phred quality <20) using Trimmomatic (Version 0.33) (Bolger

347 et al., 2014). The read alignment was done with STAR (v2.5.3a)(Dobin et al., 2013) As  
348 reference we used the Ensembl genome build GRCm38. with the gene annotations downloaded  
349 on 2015-06-25 from Ensembl. The STAR alignment options were "--outFilterType BySJout --  
350 outFilterMatchNmin 30 --outFilterMismatchNmax 10 --outFilterMismatchNoverLmax 0.05 --  
351 alignSJDBoverhangMin 1 --alignSJoverhangMin 8 --alignIntronMax 1000000 --  
352 alignMatesGapMax 1000000 --outFilterMultimapNmax 50".

353 Gene expression values were computed with the function featureCounts from the R package  
354 Rsubread (v1.26.0) (Liao et al., 2013). The options for featureCounts were: min mapping quality  
355 10 - min feature overlap 10bp - count multi-mapping reads - count only primary alignments -  
356 count reads also if they overlap multiple genes. One sample was excluded from further analysis  
357 based on quality control standards (Supplementary Figure 2A, B).

358 To detect differentially expressed genes we applied a count based negative binomial model  
359 implemented in the software package EdgeR (R version: 3.6.0, EdgeR version: 3.26.1)  
360 (Robinson et al., 2009). The differential expression was assessed using an exact test adapted  
361 for over-dispersed data. Genes showing altered expression with adjusted (Benjamini and  
362 Hochberg method) p-value <0.05 were considered differentially expressed.

363 A list of potential candidate genes at both P8 and P12 was generated by selecting genes that  
364 had a  $\log_2(\text{ratio} \geq |0.5|)$  and p-value  $\leq 0.01$ . This list was analysed for gene ontology (GO)  
365 enrichment using g:Profiler (Raudvere et al., 2019) (<https://biit.cs.ut.ee/gprofiler/gost>).

### 366 ***In situ* experiments**

367 *VIPCre x Ai14 x Prox1fl* animals were sacrificed at P12. In short, the animals were deeply  
368 anesthetized before transcardial perfusion with 1x PBS followed by ice-cold 4% PFA. The brains  
369 were dissected and post-fixed in ice-cold 4% PFA for 1h before being placed in a 30% Sucrose  
370 solution at 4°C for >24h for cryo-protection. The brains were embedded in OCT using a peel-



371 away mold and stored at -80°C. Coronal 20µm-thick brain sections containing barrel cortex  
372 were cut and collected on-slide using a cryostat (Microm International, HM 560M) and the slides  
373 were stored at -80°C until further processing.

374 *In situ* hybridization for *Elfn1* mRNA and *CR* mRNA was performed using the RNAscope kit  
375 (RNAscope Intro Pack for Multiplex Fluorescent Reagent Kit v2- Mm, 323136). Briefly, the slides  
376 were thawed, OCT residue was removed using 1x PBS (3x5min washes). The slides were then  
377 baked for 30mins at 60°C, post-fixed for 30mins in 4% PFA, dehydrated in an Ethanol dilution  
378 series (50%, 70%, 2x 100%) and incubated with RNAscope Hydrogen Peroxide for 10mins.  
379 RNAscope 1x Target Retrieval Reagents was brought to the boil and the slides were  
380 submerged for 2mins. Protease III was added to the slides and left to incubate for 45mins at  
381 40°C. After the pre-treatment the probes (Mm-Calb2, 313641 and Mn-Elfn1, 449661-C3) were  
382 hybridized to the slices for 2h at 40°C and the signal was amplified using branched DNA  
383 amplification methods and visualized with Opal dyes (Opal 520 FP1487001KT and Opal690  
384 FP1497001KT).

385 Following the RNAscope protocol the slices were immunostained to retrieve the tdtomato signal  
386 that was lost during the RNAscope protocol. Slides were washed two times with 1x PBS for  
387 5min before being blocked for 30mins using 10% normal donkey serum and 1% bovine serum  
388 albumin (BSA) in 1xPBS. The primary antibody against tdtomato (goat anti tdTomato, SICGEN  
389 Antibodies, AB8181-200) was diluted 1:700 in 1xPBS-1%BSA and left to incubate at 4°C  
390 overnight followed by a 2h incubation of secondary antibody at room temperature (donkey anti  
391 goat Cy3, Jackson Immuno Research 705-165-147, diluted 1:1000 in 1xPBS-1%BSA). Slides  
392 were cover-slipped with Fluoromount-G with DAPI (00-4959-52) and imaged using a  
393 Slidescanner (Zeiss, AxioScan Z1). Mosaic images of the whole cortex were taken using a 20x  
394 objective.

### 395 ***In situ* data analysis**

396 Image analysis was performed using custom written MATLAB codes. A two-dimensional  
397 difference of Gaussian feature enhancement algorithm was used to improve the VIP-tdtomato  
398 images, followed by Otsu thresholding to get an initial segmentation of neuronal cell bodies. To  
399 ensure an accurate representation of the cell body, segmentation of VIP INs was finalized using  
400 active contour segmentation (Kass et al., 1988) (MATLAB functions fspecial, conv2, graythresh  
401 and activecontour were used for segmentation). ”

402 During preprocessing of the *CR* and *Elfn1* images background subtraction was performed using  
403 a disk-shaped structuring element (MATLAB functions fspecial and imfilter were used for  
404 background subtraction). Subsequently, fluorescent intensity levels of both *CR* and *Elfn1* were  
405 measure within each of the segmented VIP IN cell bodies. Layers 1-6, as well as the  
406 somatosensory region, were segmented manually using the DAPI channel as reference  
407 (Supplementary Figure 4A, B) (MATLAB functions bwlabel, bwconncomp, regionprops were  
408 used for manual segmentation). To define whether a VIP cell is *CR+* we followed a Bayesian  
409 approach by assuming 80% of VIP cells are *CR+* (Kubota et al., 2011). Hence, once mean *CR*  
410 intensity per cell was calculated for each image, the population was thresholded such that  
411 approximately 80% of total VIP cells are considered *CR* positive. Statistical analysis of the data  
412 was done using the Mann-Whitney U test.

### 413 **Data and Code availability**

414 Data and custom written codes are available upon request.

415 **Author Contribution**

416 Conceptualization & Methodology T.J.S., R.K. and T.K.; Formal Analysis T.J.S., R.K. and  
417 A.Ö.A.; Investigation T.J.S., R.K. and O.H.; Writing-Original Draft, R.K.; Writing-Review &  
418 Editing, T.J.S., R.K., O.H., A.Ö.A. and T.K.; Supervision & Funding Acquisition, T.K.

419 **Acknowledgments**

420 We would like to thank G. Fishell for helpful discussions and for supporting the initiation of this  
421 project in his lab, while at NYU Medical Center, by providing access to the Prox1fl and  
422 Prox1eGFP mice. We would also like to thank L. Ibrahim for her comments and efforts on this  
423 project. Furthermore, we thank F. Matsuzaki for his generous gift of the conditional Prox1eGFP  
424 mouse line (<http://www2.clst.riken.jp/arg/mutant%20mice%20list.html> CDB0482K). We are  
425 grateful to C. Aquino and L. Opitz at the Functional Genomics Center Zurich (FGCZ) who  
426 performed the sequencing of the extracted mRNA and data analysis. Slidescanner imaging was  
427 performed with equipment maintained by the Center for Microscopy and Image Analysis (ZMB),  
428 University of Zurich. This work was supported by grants from the European Research Council  
429 (ERC, 679175, T.K), the Swiss National Science Foundation (SNSF, 31003A\_170037, T.K),  
430 Fond zur Förderung des Akademischen Nachwuchs of the UZH Alumni (T.K) and the Swiss  
431 Foundation for Excellence in Biomedical Research (R.K and T.K). O.H was supported by an  
432 EMBO post-doctoral fellowship.

433 **Additional Information**

434 Supplementary Figures S1-S4

435 The authors declare no competing interests

436 **References**

- 437 Batista-Brito, R., Vinck, M., Ferguson, K.A., Chang, J.T., Laubender, D., Lur, G., Mossner, J.M.,  
438 Hernandez, V.G., Ramakrishnan, C., Deisseroth, K., et al. (2017). Developmental Dysfunction  
439 of VIP Interneurons Impairs Cortical Circuits. *Neuron* 95, 884-895.e9.
- 440 Bolger, A.M., Lohse, M., and Usadel, B. (2014). Trimmomatic: A flexible trimmer for Illumina  
441 sequence data. *Bioinformatics* 30, 2114–2120.
- 442 Caputi, A., Rozov, A., Blatow, M., and Monyer, H. (2009). Two calretinin-positive gabaergic cell  
443 types in layer 2/3 of the mouse neocortex provide different forms of inhibition. *Cereb. Cortex* 19,  
444 1345–1359.
- 445 Cid, E., Santos-Ledo, A., Parrilla-Monge, M., Lillo, C., Arévalo Rosario, R., Lara, J.M., Aijón, J.,  
446 and Velasco, A. (2010). Prox1 expression in rod precursors and Müller cells. *Exp. Eye Res.* 90,  
447 267–276.
- 448 Dobin, A., Davis, C.A., Schlesinger, F., Drenkow, J., Zaleski, C., Jha, S., Batut, P., Chaisson,  
449 M., and Gingeras, T.R. (2013). STAR: Ultrafast universal RNA-seq aligner. *Bioinformatics* 29,  
450 15–21.
- 451 Dunn, H.A., Patil, D.N., Cao, Y., Orlandi, C., and Martemyanov, K.A. (2018). Synaptic adhesion  
452 protein ELFN1 is a selective allosteric modulator of group III metabotropic glutamate receptors  
453 in trans. *Proc. Natl. Acad. Sci. U. S. A.* 115, 5022–5027.
- 454 Favuzzi, E., Deogracias, R., Marques-Smith, A., Maeso, P., Jezequel, J., Exposito-Alonso, D.,  
455 Balia, M., Kroon, T., Hinojosa, A.J., Maraver, E.F., et al. (2019). Neurodevelopment: Distinct  
456 molecular programs regulate synapse specificity in cortical inhibitory circuits. *Science* (80-. ).  
457 363, 413–417.

- 458 Harvey, N.L., Srinivasan, R.S., Dillard, M.E., Johnson, N.C., Witte, M.H., Boyd, K., Sleeman,  
459 M.W., and Oliver, G. (2005). Lymphatic vascular defects promoted by Prox1 haploinsufficiency  
460 cause adult-onset obesity. *Nat. Genet.* *37*, 1072–1081.
- 461 He, M., Tucciarone, J., Lee, S.H., Nigro, M.J., Kim, Y., Levine, J.M., Kelly, S.M., Krugikov, I.,  
462 Wu, P., Chen, Y., et al. (2016). Strategies and Tools for Combinatorial Targeting of GABAergic  
463 Neurons in Mouse Cerebral Cortex. *Neuron* *91*, 1228–1243.
- 464 Hempel, C.M., Sugino, K., and Nelson, S.B. (2007). A manual method for the purification of  
465 fluorescently labeled neurons from the mammalian brain. *Nat. Protoc.* *2*, 2924–2929.
- 466 Huang, Z.J., and Paul, A. (2019). The diversity of GABAergic neurons and neural  
467 communication elements. *Nat. Rev. Neurosci.* *20*, 563–572.
- 468 Iwano, T., Masuda, A., Kiyonari, H., Enomoto, H., and Matsuzaki, F. (2012). Prox1  
469 postmitotically defines dentate gyrus cells by specifying granule cell identity over CA3 pyramidal  
470 cell fate in the hippocampus. *Development* *139*, 3051–3062.
- 471 Kaltezioti, V., Kouroupi, G., Oikonomaki, M., Mantouvalou, E., Stergiopoulos, A., Charonis, A.,  
472 Rohrer, H., Matsas, R., and Politis, P.K. (2010). Prox1 regulates the Notch1-mediated inhibition  
473 of neurogenesis. *PLoS Biol.* *8*.
- 474 Kaltezioti, V., Antoniou, D., Stergiopoulos, A., Rozani, I., Rohrer, H., and Politis, P.K. (2014).  
475 Prox1 Regulates Olig2 Expression to Modulate Binary Fate Decisions in Spinal Cord Neurons.  
476 *J. Neurosci.* *34*, 15816–15831.
- 477 Kass, M., Witkin, A., and Terzopoulos, D. (1988). Snakes: Active contour models. *Int. J.*  
478 *Comput. Vis.* *1*, 321–331.
- 479 Kubota, Y., Shigematsu, N., Karube, F., Sekigawa, A., Kato, S., Yamaguchi, N., Hirai, Y.,

480 Morishima, M., and Kawaguchi, Y. (2011). Selective coexpression of multiple chemical markers  
481 defines discrete populations of neocortical gabaergic neurons. *Cereb. Cortex* *21*, 1803–1817.

482 De La Rossa, A., Bellone, C., Golding, B., Vitali, I., Moss, J., Toni, N., Lüscher, C., and  
483 Jabaudon, D. (2013). In vivo reprogramming of circuit connectivity in postmitotic neocortical  
484 neurons. *Nat. Neurosci.* *16*, 193–200.

485 Liao, Y., Smyth, G.K., and Shi, W. (2013). The Subread aligner: Fast, accurate and scalable  
486 read mapping by seed-and-vote. *Nucleic Acids Res.* *41*.

487 Madisen, L., Zwingman, T.A., Sunkin, S.M., Oh, S.W., Zariwala, H.A., Gu, H., Ng, L.L., Palmiter,  
488 R.D., Hawrylycz, M.J., Jones, A.R., et al. (2010). A robust and high-throughput Cre reporting  
489 and characterization system for the whole mouse brain. *Nat. Neurosci.* *13*, 133–140.

490 De Marco García, N. V, Karayannis, T., and Fishell, G. (2011). Neuronal activity is required for  
491 the development of specific cortical interneuron subtypes. *Nature* *472*, 351–355.

492 De Marco García, N. V, Priya, R., Tuncdemir, S.N., Fishell, G., Karayannis, T., De Marco  
493 Garcia, N. V, Priya, R., Tuncdemir, S.N., Fishell, G., and Karayannis, T. (2015). Sensory inputs  
494 control the integration of neurogliaform interneurons into cortical circuits. *Nat. Neurosci.* *18*,  
495 393–401.

496 Mayer, C., Hafemeister, C., Bandler, R.C., Machold, R., Batista Brito, R., Jaglin, X., Allaway, K.,  
497 Butler, A., Fishell, G., and Satija, R. (2018). Developmental diversification of cortical inhibitory  
498 interneurons. *Nature* *555*, 457–462.

499 Mi, D., Li, Z., Lim, L., Li, M., Moissidis, M., Yang, Y., Gao, T., Hu, T.X., Pratt, T., Price, D.J., et  
500 al. (2018). Early emergence of cortical interneuron diversity in the mouse embryo. *Science* (80-  
501 ). *360*, 81–85.

502 Miyoshi, G., Young, A., Petros, T., Karayannis, T., McKenzie Chang, M., Lavado, A., Iwano, T.,  
503 Nakajima, M., Taniguchi, H., Huang, Z.J., et al. (2015). Prox1 Regulates the Subtype-Specific  
504 Development of Caudal Ganglionic Eminence-Derived GABAergic Cortical Interneurons. *J.*  
505 *Neurosci.* *35*, 12869–12889.

506 Mossner, J.M., Batista-Brito, R., Pant, R., and Cardin, J.A. (2020). Developmental loss of  
507 MeCP2 from VIP interneurons impairs cortical function and behavior. *Elife* *9*.

508 Palmer, L., Murayama, M., and Larkum, M. (2012). Inhibitory regulation of dendritic activity in  
509 vivo. *Front. Neural Circuits* *6*, 1–10.

510 Pan, N.C., Fang, A., Shen, C., Sun, L., Wu, Q., and Wang, X. (2018). Early Excitatory Activity-  
511 Dependent Maturation of Somatostatin Interneurons in Cortical Layer 2/3 of Mice. *Cereb. Cortex*  
512 *4107–4118*.

513 Paul, A., Crow, M., Raudales, R., He, M., Gillis, J., and Huang, Z.J. (2017). Transcriptional  
514 Architecture of Synaptic Communication Delineates GABAergic Neuron Identity. *Cell* *171*, 522-  
515 539.e20.

516 Picelli, S., Björklund, Å.K., Faridani, O.R., Sagasser, S., Winberg, G., and Sandberg, R. (2013).  
517 Smart-seq2 for sensitive full-length transcriptome profiling in single cells. *Nat. Methods* *10*,  
518 1096–1098.

519 Pouille, F., and Scanziani, M. (2004). Routing of spike series by dynamic circuits in the  
520 hippocampus. *Nature* *429*, 717–723.

521 Raudvere, U., Kolberg, L., Kuzmin, I., Arak, T., Adler, P., Peterson, H., and Vilo, J. (2019).  
522 g:Profiler: a web server for functional enrichment analysis and conversions of gene lists (2019  
523 update). *Nucleic Acids Res.* *47*, W191–W198.

524 Robinson, M.D., McCarthy, D.J., and Smyth, G.K. (2009). edgeR: A Bioconductor package for  
525 differential expression analysis of digital gene expression data. *Bioinformatics* 26, 139–140.

526 Sohn, J., Okamoto, S., Kataoka, N., Kaneko, T., Nakamura, K., and Hioki, H. (2016). Differential  
527 Inputs to the Perisomatic and Distal-Dendritic Compartments of VIP-Positive Neurons in Layer  
528 2/3 of the Mouse Barrel Cortex. *Front. Neuroanat.* 10, 1–18.

529 Stachniak, T.J., Sylwestrak, E.L., Scheiffele, P., Hall, B.J., and Ghosh, A. (2019). Efn1-Induced  
530 Constitutive Activation of mGluR7 Determines Frequency-Dependent Recruitment of  
531 Somatostatin Interneurons. *J. Neurosci.* 39, 4461–4474.

532 Sylwestrak, E.L., and Ghosh, A. (2012). Efn1 regulates target-specific release probability at  
533 CA1-interneuron synapses. *Science* (80-. ). 338, 536–540.

534 Taniguchi, H., He, M., Wu, P., Kim, S., Paik, R., Sugino, K., Kvitsani, D., Fu, Y., Lu, J., Lin, Y.,  
535 et al. (2011). A Resource of Cre Driver Lines for Genetic Targeting of GABAergic Neurons in  
536 Cerebral Cortex. *Neuron* 71, 995–1013.

537 Tasic, B., Yao, Z., Graybiel, L.T., Smith, K.A., Nguyen, T.N., Bertagnolli, D., Goldy, J., Garren,  
538 E., Economo, M.N., Viswanathan, S., et al. (2018). Shared and distinct transcriptomic cell types  
539 across neocortical areas. *Nature* 563, 72–78.

540 Tomioka, N.H., Yasuda, H., Miyamoto, H., Hatayama, M., Morimura, N., Matsumoto, Y., Suzuki,  
541 T., Odagawa, M., Odaka, Y.S., Iwayama, Y., et al. (2014). Efn1 recruits presynaptic mGluR7 in  
542 trans and its loss results in seizures. *Nat. Commun.* 5, 1–16.

543 Whipple, A.J., Breton-Provencher, V., Jacobs, H.N., Chitta, U.K., Sur, M., and Sharp, P.A.  
544 (2020). Imprinted Maternally Expressed microRNAs Antagonize Paternally Driven Gene  
545 Programs in Neurons. *Mol. Cell* 78, 85-95.e8.

546





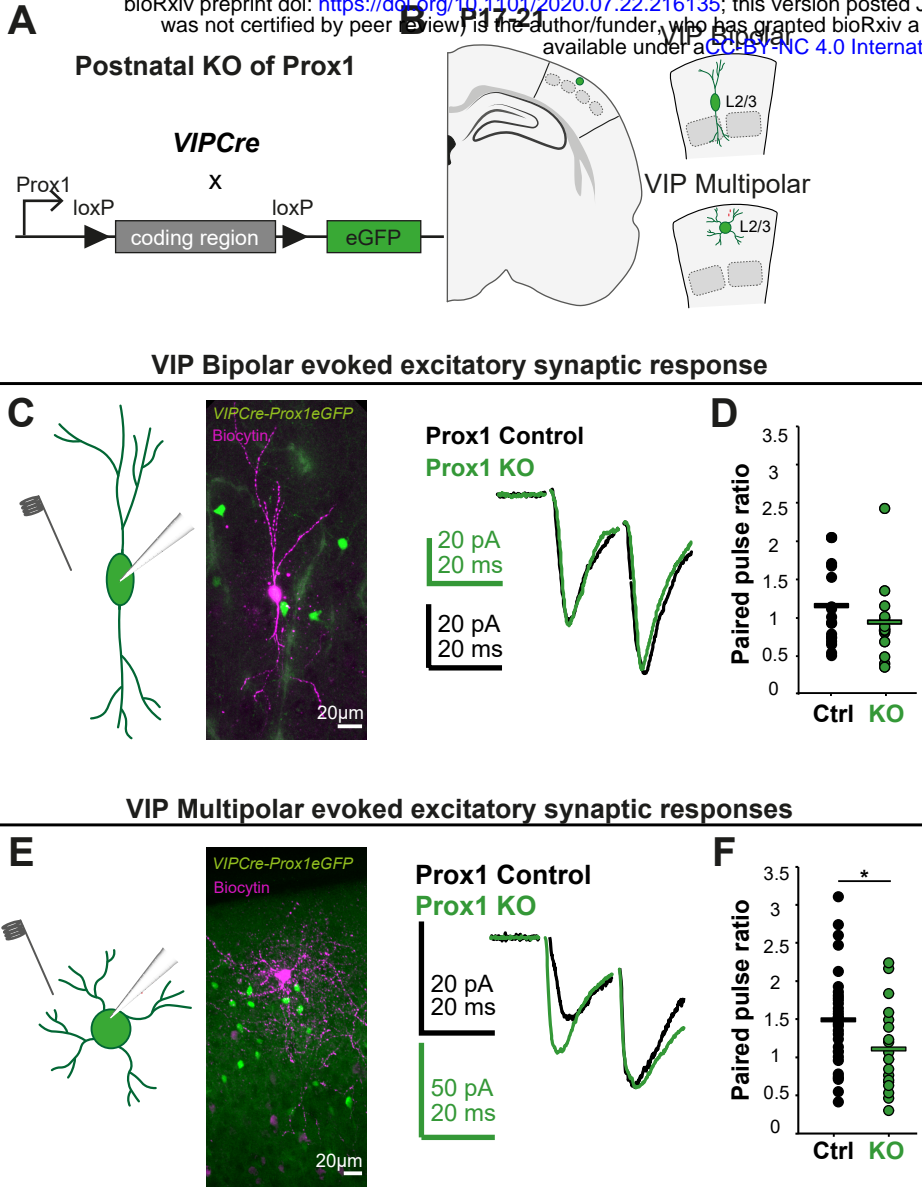

**Figure 1: Postnatal Prox1 removal leads to changes in presynaptic release probability onto VIP multipolar but not bipolar cells**

(A) Visual representation of Prox1 conditional knock-out strategy. VIPCre turns on postnatally and removes part of the coding region of the Prox1 locus shifting eGFP into frame and allowing for the visualization of the control (Prox1 het) and Prox1 KO cells.

(B) Schematic representation of the experiment. L2/3 multipolar and bipolar VIP cells were recorded in the somatosensory barrel cortex at P17-21 of acute brain slices from control and Prox1 KO animals.

(C) & (E) Left: schematic representation for probing the evoked excitatory synaptic responses onto control and Prox1 KO VIP cells. The stimulating electrode is shown close to the soma and proximal dendrites of the eGFP-positive cells, which are recorded in whole-cell patch clamp mode. Middle: the recorded cells were filled with biocytin and their morphology revealed post-hoc. Right: examples of a pair of evoked synaptic responses for control and KO cells, which are overlaid and scaled to the second response.

(D) All data points for paired pulse ratio (PPR; 2<sup>nd</sup>/1<sup>st</sup> response) for control (n/N=18/11) and KO (n/N=13/11) bipolar VIP cells,  $p = 0.3$ ,  $t = 1.1$ .

(F) All data points for paired pulse ratio of control (n/N=33/18) and KO (n/N=19/14) multipolar VIP cells,  $p = 0.03$ ,  $t = 2.17$ . Statistics: t-test.

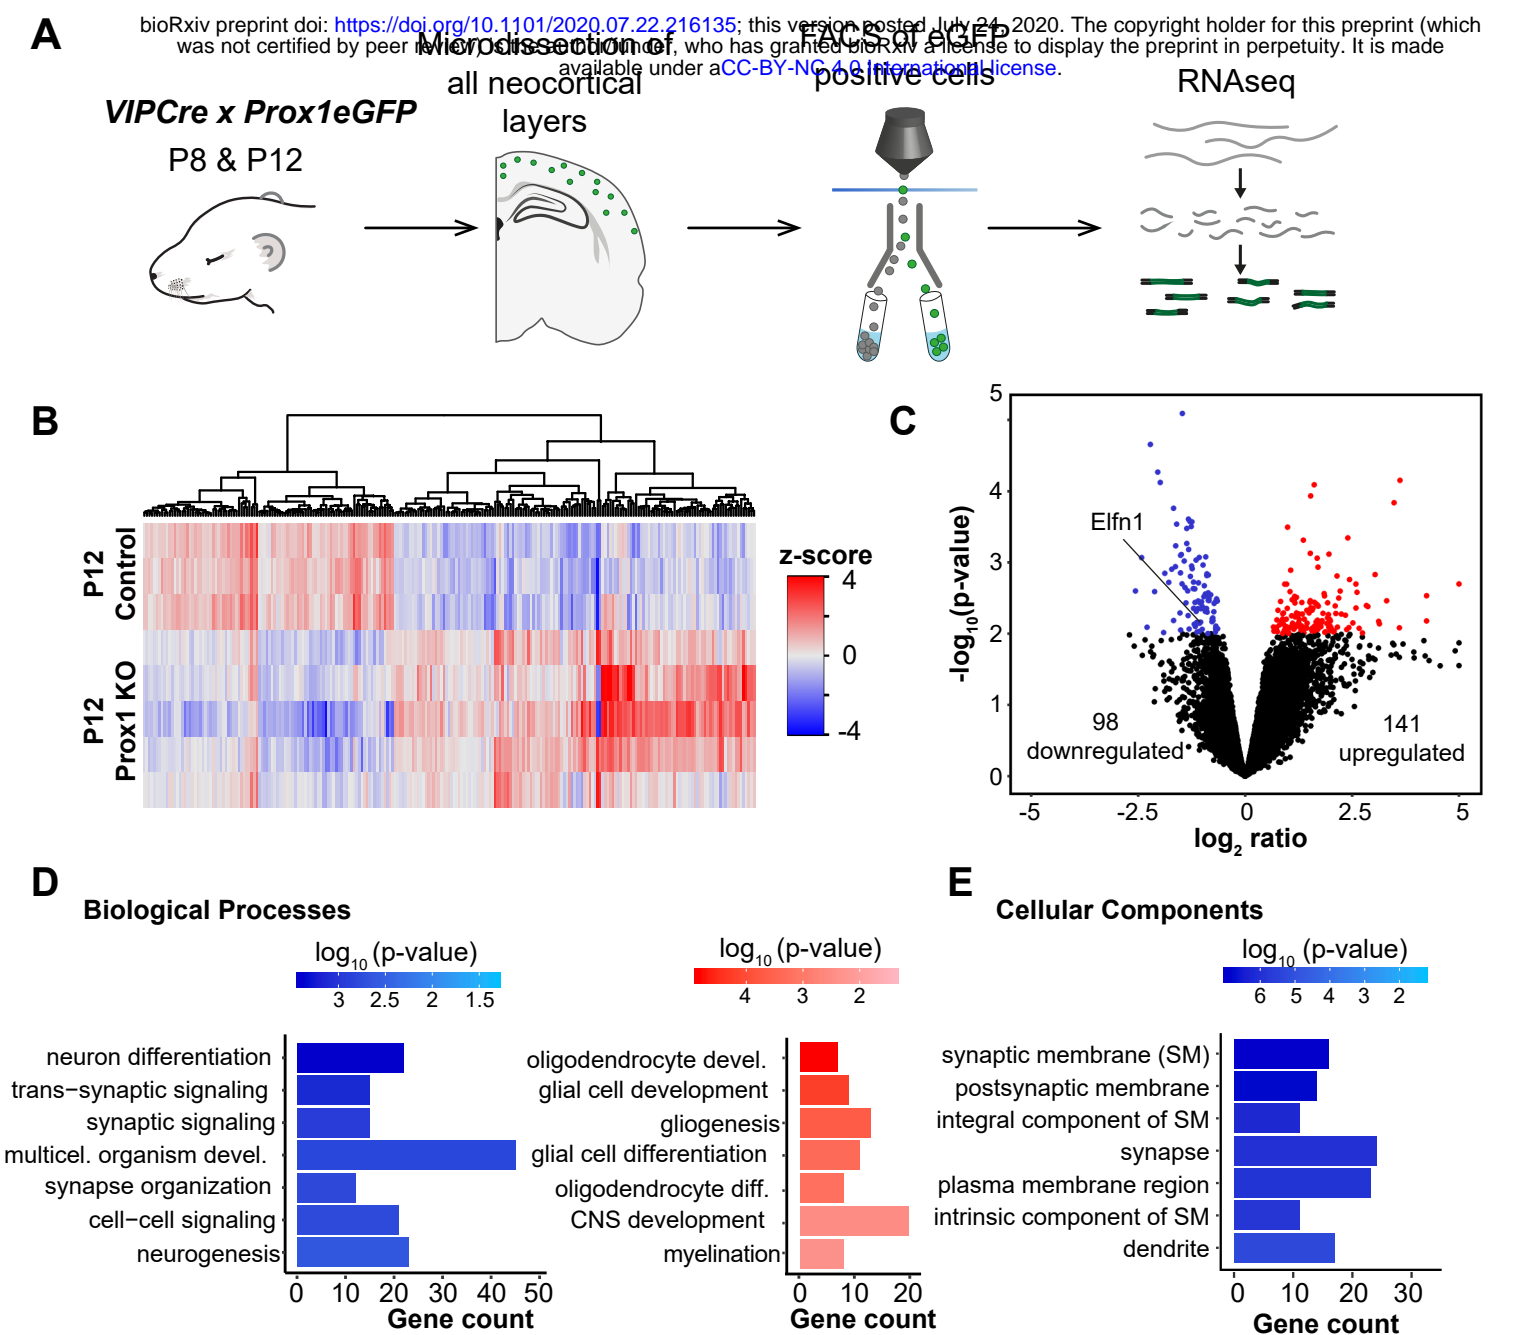

**Figure 2: Postnatal removal of Prox1 from VIP cells leads to transcriptomic changes in synaptic proteins**

(A) Schematic of experimental workflow. VIPCre-Prox1eGFP control and KO cells were sorted using FACS at P8 and P12 and bulk RNA sequencing was performed

(B) Heat map showing the clustering according to function of up- (red) and downregulated (blue) genes at P12.

(C) Volcano Plot highlighting the differentially expressed candidate genes at P12. They were selected based on  $\log_2$  ratio  $\geq |0.5|$  and  $p\text{-value} \leq 0.01$

(D) GO: Biological Processes enrichment analysis of the candidate genes at P12. The down-regulated genes are depicted in blue and the up-regulated gene in red.

(E) GO: Cellular Components (CC) enrichment analysis of the candidate genes at P12. The down-regulated genes are depicted in blue. The up-regulated genes did not show any clustering in the GO:CC

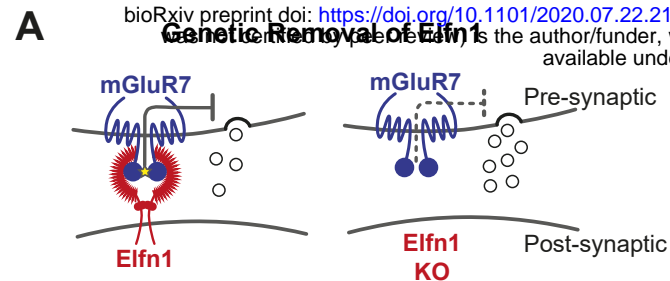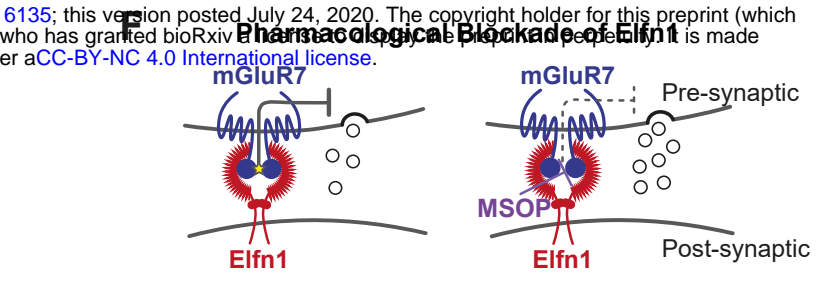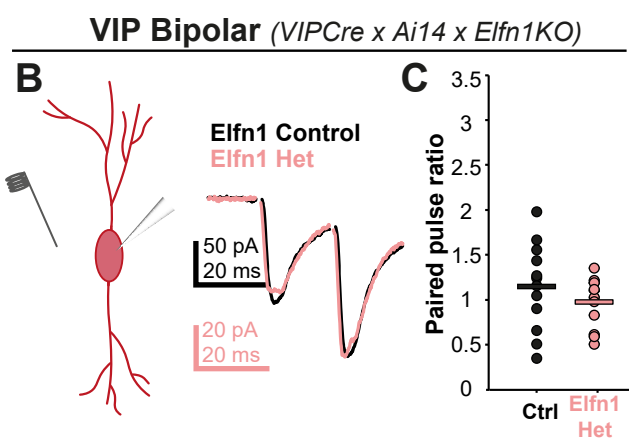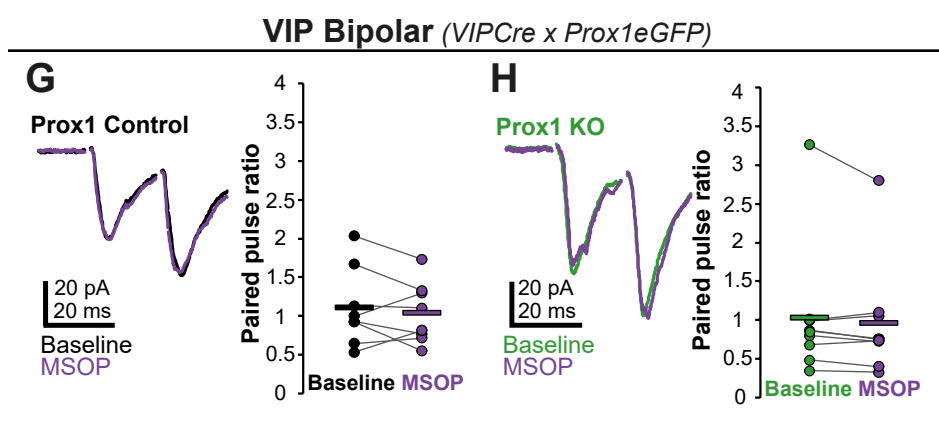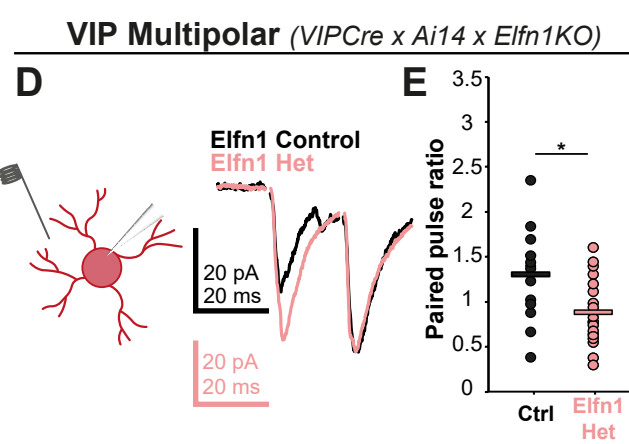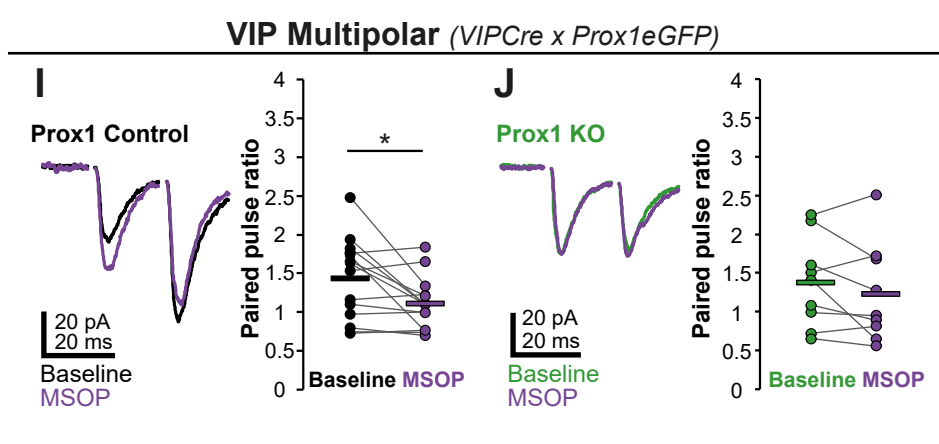

**Figure 3: Efn1 contributes to synaptic facilitation onto VIP+ multipolar, but not bipolar cells.**

(A) A compound mouse line labeling VIP cells was combined on the background of an *Efn1* germline knock-out. The presence of *Efn1* increases initial release probability of glutamate. Animals heterozygous (het) and wildtype (wt) for the germline removal were used as experimental and control group respectively.

(B)/(D) Left: schematic representation of the evoked paired-pulse protocol, with the extracellular stimulating and intracellular recording electrodes shown. Right: example of a pair of synaptic responses evoked onto VIP bipolar and multipolar cells after stimulation (scaled to 2nd evoked response).

(C) All data points for paired pulse ratio (PPR) of *Efn1* Control (n/N=12/4) and Het (n/N=12/4) bipolar VIP cells,  $p = 0.3$ ,  $t = 1.06$ .

(E) All data points for PPR of *Efn1* Control (n/N=14/6) and Het (n/N=20/8) multipolar VIP cells,  $p = 0.008$ ,  $t = 2.84$ . Statistics: t-test

(F) Testing for the effect of MSOP, a presynaptic mGluR blocker and hence *Efn1* function, on evoked excitatory responses onto control (Het) and *Prox1* KO cells.

(G-J) Left: example of a pair of synaptic responses evoked onto VIP bipolar and multipolar cells after stimulation (scaled to 2nd evoked response). Right: all data points for PPR are plotted.

(G) PPR of bipolar *Prox1* Control cells (n/N=8/8) under baseline conditions and with MSOP,  $p = 0.5$ ,  $t = 0.74$ .

(H) PPR of bipolar *Prox1* KO cells (n/N=9/9) under baseline conditions and with MSOP,  $p = 0.2$ ,  $t = 1.26$ .

(I) PPR of multipolar *Prox1* Control cells (n/N=14/9) under baseline conditions and with MSOP,  $p = 0.02$ ,  $t = 2.74$ .

(J) PPR of multipolar *Prox1* KO cells (n/N=9/8) under baseline conditions and with MSOP,  $p = 0.2$ ,  $t = 1.33$ .

Statistics: paired t-test

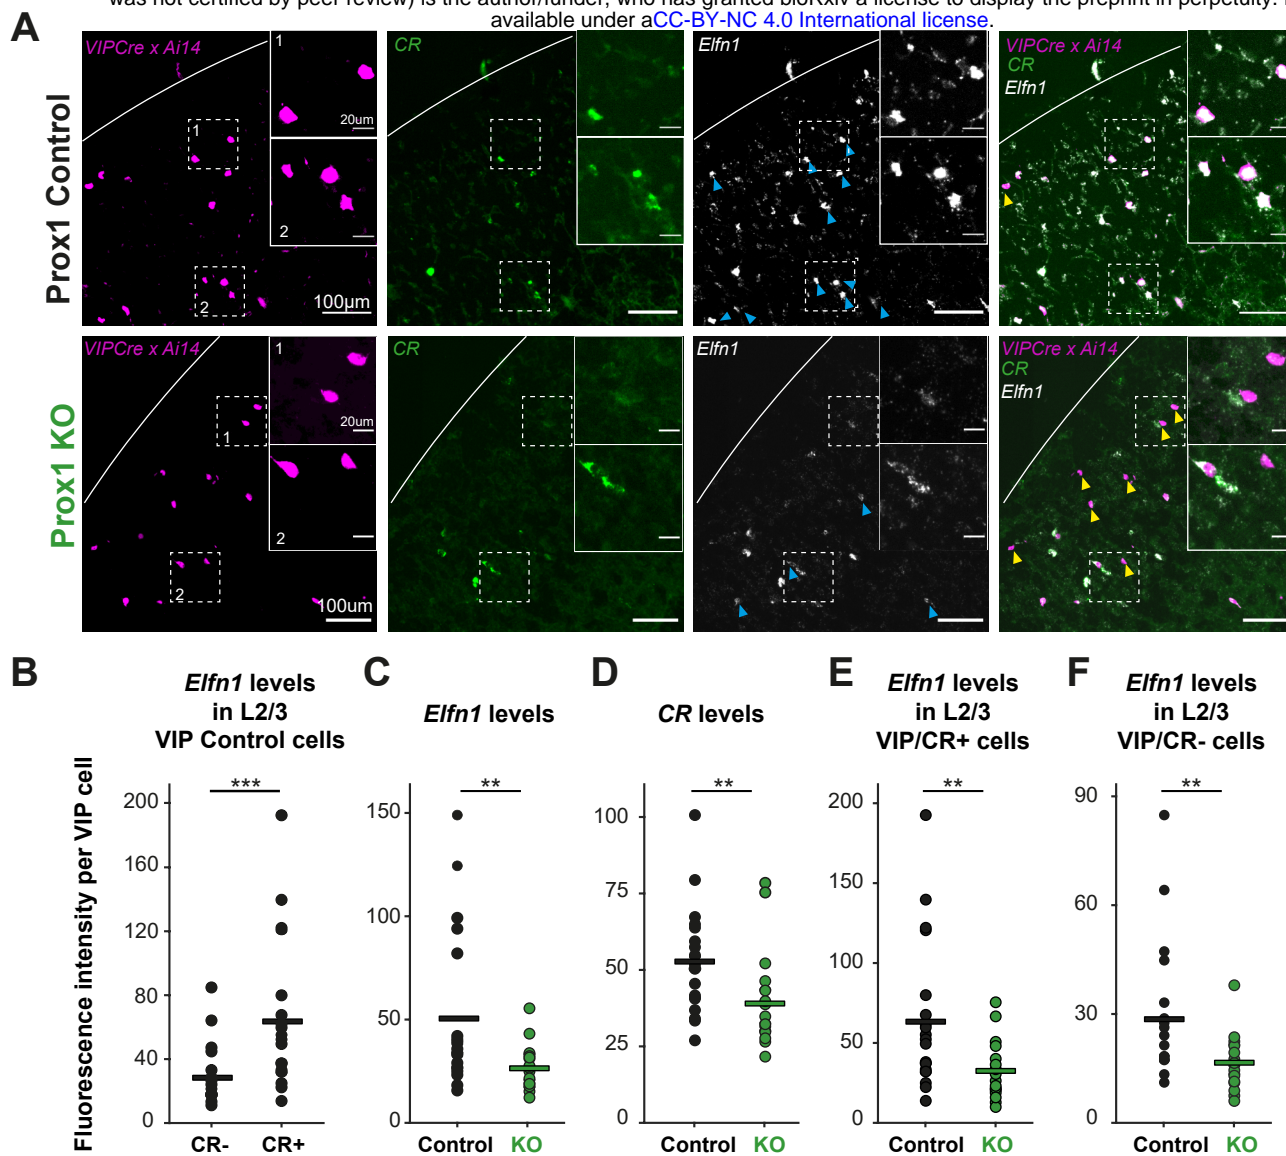

**Figure 4: Prox1 regulates *Efn1* expression in all VIP interneurons**

(A) Examples of *Efn1* and *CR* *in-situ* labelling in L2/3 tdTomato positive VIP cells in control (top) and Prox1 KO (bottom) tissue at P12. The insets show the close up of the dashed-line boxes including *CR* positive (*CR*+) and *CR* negative (*CR*-) VIP cells. The white parabolic line indicates the pia. Yellow arrows highlight VIP positive *Efn1* negative cells. Blue arrows highlight *Efn1* positive VIP cells. Note: there are also *Efn1* positive cells that are not VIP positive likely corresponding to somatostatin cells.

(B) *Efn1* levels in VIP multipolar (*CR*-) and bipolar (*CR*+) cells in L2/3 of the somatosensory cortex,  $p=0.001$  (N=3 animals, n=19 sections/images).

(C) *Efn1* levels in VIP cells in all layers and cortical areas in control (N/n=3/19) and Prox1 KO (N/n=2/18) tissue,  $p=0.004$ .

(D) *CR* levels in VIP cells in all layers and cortical areas in control (N/n=3/19) and Prox1 KO tissue (N/n=2/18),  $p=0.004$ .

(E) *Efn1* levels in VIP bipolar cells in L2/3 of the somatosensory cortex in control (N/n=3/19) and Prox1 KO (N/n=2/18) tissue,  $p=0.004$ .

(F) *Efn1* levels in VIP multipolar cells in L2/3 of the somatosensory cortex in control (N/n=3/19) and Prox1 KO (N/n=2/18) tissue,  $p=0.006$ . Statistics: Mann-Whitney-U-Test.
